# Supplementary material for: A noble metal-enhanced Au@CuO heterostructure with multienzyme-mimicking activities for colorimetric detection of tannic acid
Source: Royal Society of Chemistry journal article supplement (doi:10.1039/d4an01013b), 2024-01-01
Supplement: d4an01013b1.pdf [file d4an01013b1.pdf]

## Supporting Information

### **Noble metal-enhanced Au@CuO heterostructure with multienzyme-mimicking activities for colorimetric detection of tannic acid**

Xin Kang<sup>1,2</sup>, Yiping Ren<sup>1</sup>, Jin Wang<sup>1</sup>, Xu Zhu<sup>1</sup>, Ning Xin<sup>1</sup>, Fenglei Gao<sup>1,\*</sup> and Dehong Yu<sup>1,3,\*</sup>

1. Jiangsu Key Laboratory of New Drug Research and Clinical Pharmacy, Xuzhou Medical University, Jiangsu 221004, Xuzhou, China.

2. The First Clinical Medical College, Xuzhou Medical University, Xuzhou, Jiangsu, China.

3. The Affiliated Pizhou Hospital of Xuzhou Medical University, Jiangsu 221399, China.

\*Corresponding Author. Email: 15380117222@163.com (D. Yu), jsxzgfl@sina.com (F. Gao).

## Experimental section

**Materials.** Cupric chloride ( $\text{CuCl}_2$ ), poly(vinylpyrrolidone) (PVP, MW = 40000), sodium hydroxide (NaOH) 3,3',5,5'-tetramethylbenzidine (TMB), hydrogen peroxide ( $\text{H}_2\text{O}_2$ ), gold(III) chloride trihydrate ( $\text{HAuCl}_4 \cdot 3\text{H}_2\text{O}$ ), terephthalic acid (TA), 10-Anthracenediyl-bis(methylene)(ABDA), o-phenylenediamine(OPD), 2,2'-azino-bis (3-ethylbenzothiazoline-6-sulfonate) (ABTS), reduced glutathione (GSH, 97%), rhodamine B (Rh B), 5,5-Dimethyl-1-pyrroline N-oxide (DMPO) were purchased from Sigma-Aldrich. All the above materials were of reagent grade and used as received without further purification.

**Synthesis of Au@CuO Nc.** The preparation of  $\text{Cu}_2\text{O}$  nanocubes began by adding a  $\text{CuCl}_2$  aqueous solution (33 mL, 3.20 mM) to a 50 mL vial. Subsequently, a NaOH aqueous solution (1 mL, 0.35 M) was introduced gradually under magnetic stirring, causing the solution to shift from colorless to light blue. Five minutes later, a quick injection of L-ascorbic acid sodium aqueous solution (1 mL, 0.10 M) into the mixture was performed, and the reaction was allowed to continue for 30 minutes during which the color transitioned from light blue to orange, signaling the formation of  $\text{Cu}_2\text{O}$ . The resultant  $\text{Cu}_2\text{O}$  nanocubes were then isolated by centrifugation and cleansed with a mixture of DI water and ethanol. For the synthesis of Au@CuO Nc, these  $\text{Cu}_2\text{O}$  nanocubes were redissolved in deionized water (10 mL). PVP (0.10 g) was added until it dissolved completely, followed by the addition of  $\text{HAuCl}_4$  (0.2 mL, 24 mM). The mixture was stirred magnetically at 25 °C for 1 hour. The final product, Au@CuO Nc, was gathered through centrifugation and repeatedly washed with a DI water/ethanol solution.

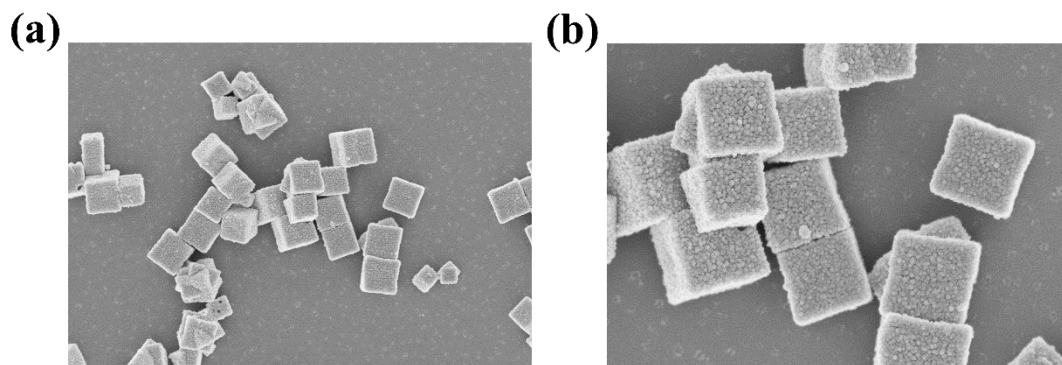

**Fig. S1.** (a, b) SEM images of Au@CuO

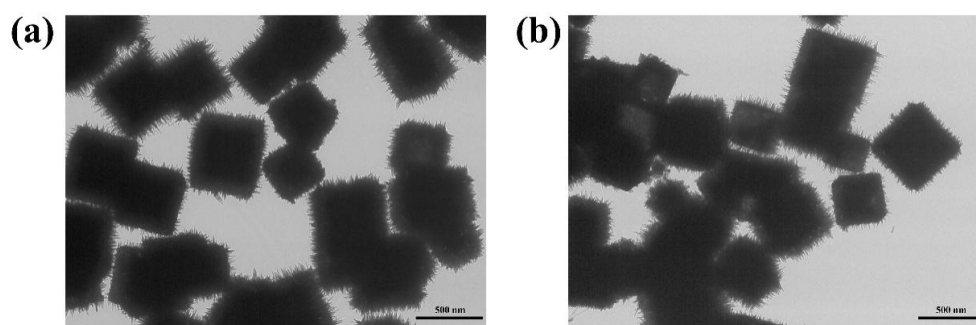

**Fig. S2.** (a, b) TEM images of Au@CuO.

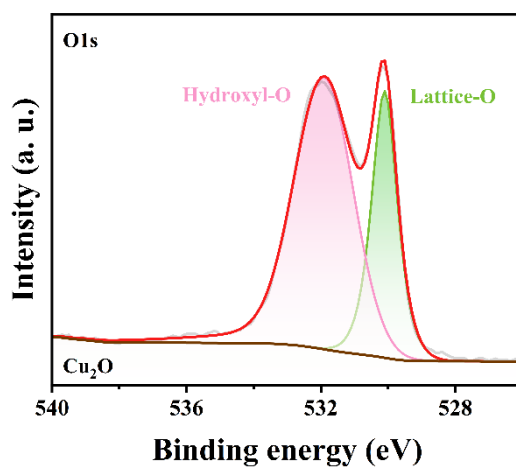

**Fig. S3.** O 1s XPS spectra of Cu<sub>2</sub>O.

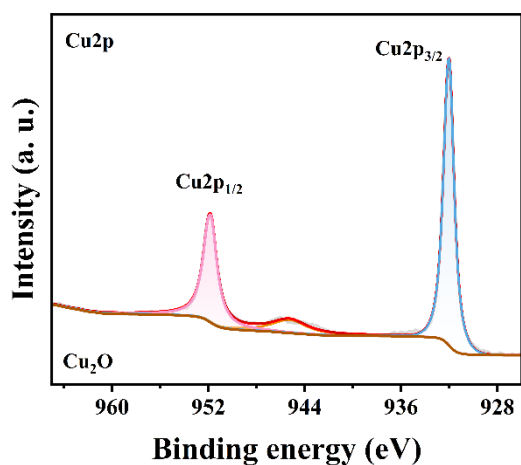

Fig. S4. Cu2p XPS spectra of Cu<sub>2</sub>O.

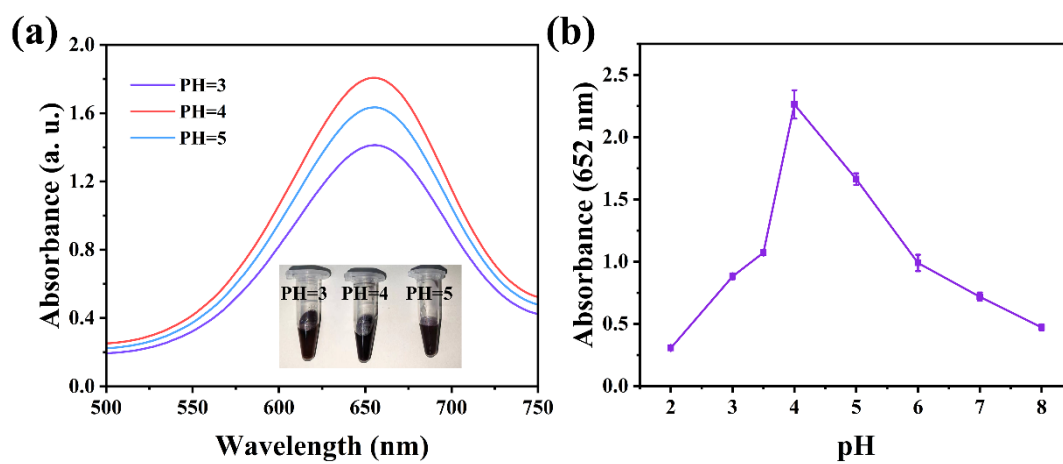

Fig. S5. (a) the color and curve of ABTS + H<sub>2</sub>O<sub>2</sub> + Au@CuO; (b) the color and curve of OPD + H<sub>2</sub>O<sub>2</sub> + Au@CuO

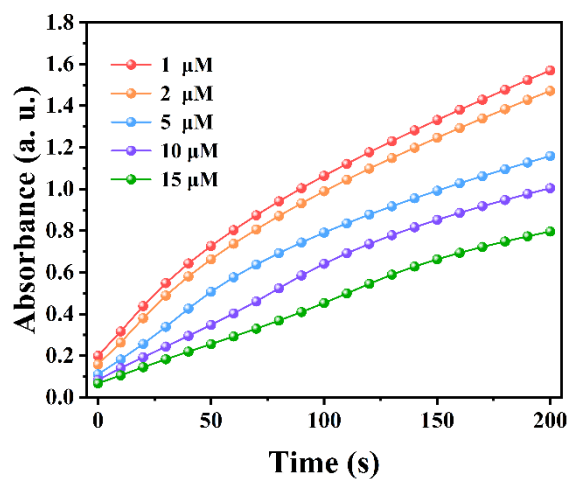

**Fig. S6.** The change in absorbance for difference concentrations of TA over time.

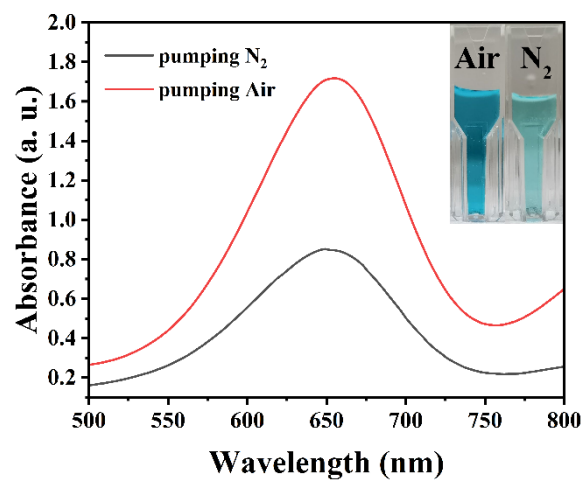

**Fig. S7.** Changes in color and absorbance under different conditions.

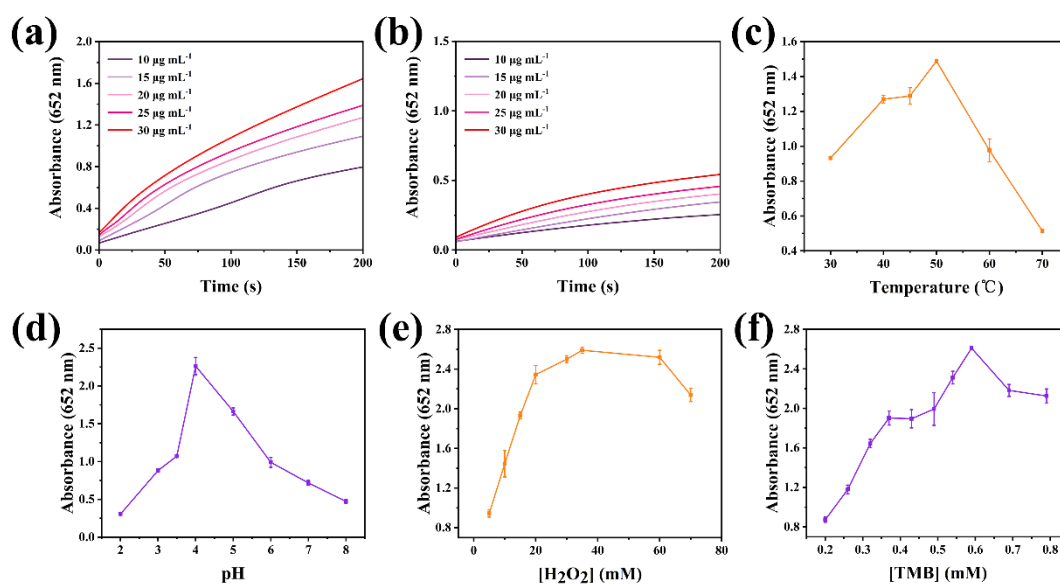

**Fig. S8.** (a, b) Time-dependent absorbance at 652 nm varied with different concentrations of Au@CuO and Cu<sub>2</sub>O; Effect of various factors on the peroxidase-like property of Au@CuO nanozymes: (c) Temperature, (d) pH, (e) H<sub>2</sub>O<sub>2</sub> concentration, and (f) TMB concentration.

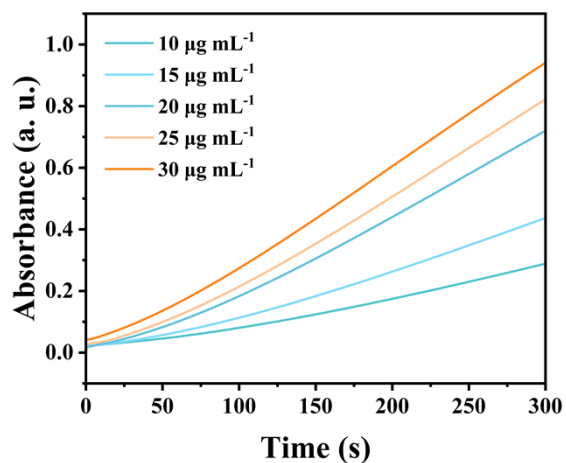

**Fig. S9.** Time-dependent absorbance at 420 nm varied with different concentrations of Au@CuO when using OPD as the reaction substrate.

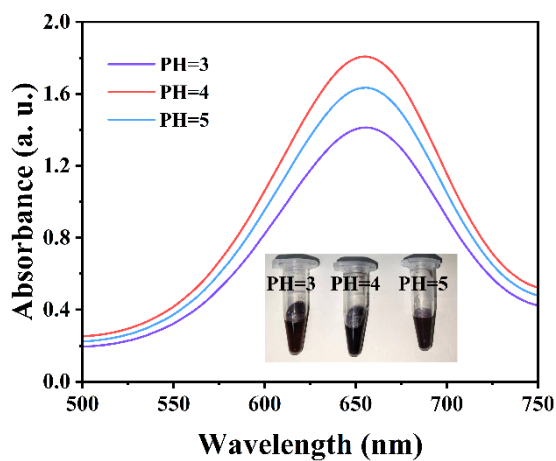

**Fig. S10.** Different pH conditions on the activity of nanomaterials.

**Table S1.** Comparison of the kinetic constants of different nanozymes.

| catalyst                      | substance                     | $K_m$ (mM) | $V_{max}(10^{-8}M/s)$ | refs      |
|-------------------------------|-------------------------------|------------|-----------------------|-----------|
| pd@CeO <sub>2</sub> /N-PC-rGO | TMB                           | 0.207      | 15.1                  | 1         |
|                               | H <sub>2</sub> O <sub>2</sub> | 0.605      | 6.75                  |           |
| KCN-8                         | TMB                           | 0.035      | 4.62                  | 2         |
|                               | H <sub>2</sub> O <sub>2</sub> | 1.05       | 4.29                  |           |
| 0.2-Cu-N/C                    | TMB                           | 72.8       | 0.255                 | 3         |
|                               | H <sub>2</sub> O <sub>2</sub> | 0.53       | 1.42                  |           |
| Cu NPs/CoO/CNFs               | TMB                           | 0.26       | 12.32                 | 4         |
|                               | H <sub>2</sub> O <sub>2</sub> | 0.14       | 42.24                 |           |
| PAN-CuO                       | TMB                           | 0.58       | 20.14                 | 5         |
|                               | H <sub>2</sub> O <sub>2</sub> | 0.09       | 4.68                  |           |
| UiO-66-NH <sub>2</sub> -Pt    | TMB                           | 0.322      | 16.49                 | 6         |
|                               | H <sub>2</sub> O <sub>2</sub> | 1.25       | 0.232                 |           |
| Au/Cu <sub>2</sub> O          | TMB                           | 0.21       | 6.08                  | 4         |
|                               | H <sub>2</sub> O <sub>2</sub> | 10.56      | 6.68                  |           |
| UsAuNPs/2D MOF                | TMB                           | 0.14       | 5.21                  | 7         |
|                               | H <sub>2</sub> O <sub>2</sub> | 0.05       | 13.48                 |           |
| Au@CuO                        | TMB                           | 0.52       | 51.49                 | this work |
|                               | H <sub>2</sub> O <sub>2</sub> | 6.35       | 24.86                 |           |

**Table S2.** Comparison of Nanoparticle-Based Detection of TA.

| No. | Material                             | Linear range<br>( $\mu\text{M}$ ) | LOD<br>( $\mu\text{M}$ ) | Ref.      |
|-----|--------------------------------------|-----------------------------------|--------------------------|-----------|
| 1   | SWNTs                                | 0.05-1                            | 0.008                    | 8         |
| 2   | $\text{K}_3\text{Fe}(\text{CN})_6$   | 0.0003-0.1                        | 0.0001                   | 9         |
| 3   | $\text{KMnO}_4/\text{Ce}(\text{IV})$ | 0.07-7                            | 0.026                    | 10        |
| 4   | PEG/CPE                              | 0.08-2.1                          | 0.072                    | 11        |
| 5   | ZnO-Pt/GCE                           | 0.04-31.56                        | 0.02                     | 12        |
| 6   | Cu/CN                                | 0.09-3.2                          | 0.03                     | 13        |
| 7   | Fe-N-C MFs                           | 0.2-50                            | 0.079                    | 14        |
| 8   | Au@CuO                               | 0.3-2.4                           | 0.25                     | this work |

**Table S3.** Detection results of TA in actual sample.

| Samples   | Concentration ( $\mu\text{M}$ ) |        | Recovery | RSD  |
|-----------|---------------------------------|--------|----------|------|
|           | Added                           | Found  | %        | %    |
| Green tea | 0.5                             | 0.6676 | 96.62    | 3.59 |
|           | 1.0                             | 1.1320 | 94.75    | 4.82 |
|           | 2.0                             | 2.1861 | 100.08   | 2.01 |



## Notes and references

- 1 T. Zhang, N. Lu, M. Zhang, R. Zhang, H. Jiang, C. Wang and D. Xing, *ACS Appl. Nano Mater.*, 2023, **7**, 756-765.
- 2 S. Li, C. He, S. Chu, P. Xu, D. Lin, Y. Jiang and Y. Lu, *ACS Appl. Nano Mater.*, 2023, **7**, 966-975.
- 3 C. Tao, Y. Jiang, S. Chu, Y. Miao, J. Zhang, Y. Lu and L. Niu, *Anal. Chem.*, 2024, **96**, 3107-3115.
- 4 A. Jiao, L. Xu, Y. Tian, Q. Cui, X. Liu and M. Chen, *Talanta*, 2021, **225**, 121990.
- 5 X. Zheng, Q. Lian, L. Zhou, Y. Jiang and J. Gao, *ACS Sustainable Chemistry & Engineering*, 2021, **9**, 7030-7043.
- 6 Q. Fan, J. Wang, J. M. Biazik, S. Geng, F. Mazur, Y. Li, P. C. Ke and R. Chandrawati, *ACS Appl. Bio Mater.*, 2024, **7**, 182-192.
- 7 H. Yang, Z. Sun, X. Qin, H. Wu, H. Zhang and G. Liu, *Food. Chem.*, 2021, **376**, 131906.
- 8 H. Wan, Q. Zou, R. Yan, F. Zhao and B. Zeng, *Microchim. Acta*, 2007, **159**, 109-115.
- 9 C. Xie and H. Cui, *Water Research* 2003, **37**, 233–237.
- 10 Y. Liu and S. Han, *Food Anal Method*, 2017, **10**, 3398-3406.
- 11 J. V. Piovesan, E. R. Santana and A. Spinelli, *Food. Chem.*, 2020, **326**, 127055.
- 12 S. Li, K. Zhang, J. Wang, B. Yan, C. Wang, Z. Xiong, H. Xu and Y. Du, *Sens. Actuators, B*, 2017, **252**, 717-724.
- 13 X. Xie, X. Chen, Y. Wang, M. Zhang, Y. Fan and X. Yang, *Talanta*, 2023, **257**, 124387.
- 14 X. Wu, Z. Wang, Y. Liu and D. Li, *Chem. Eng. J.*, 2023, **468**, 143638.
